# Supplementary material
Source: PubMed Central journal article supplement (PMC2723064)

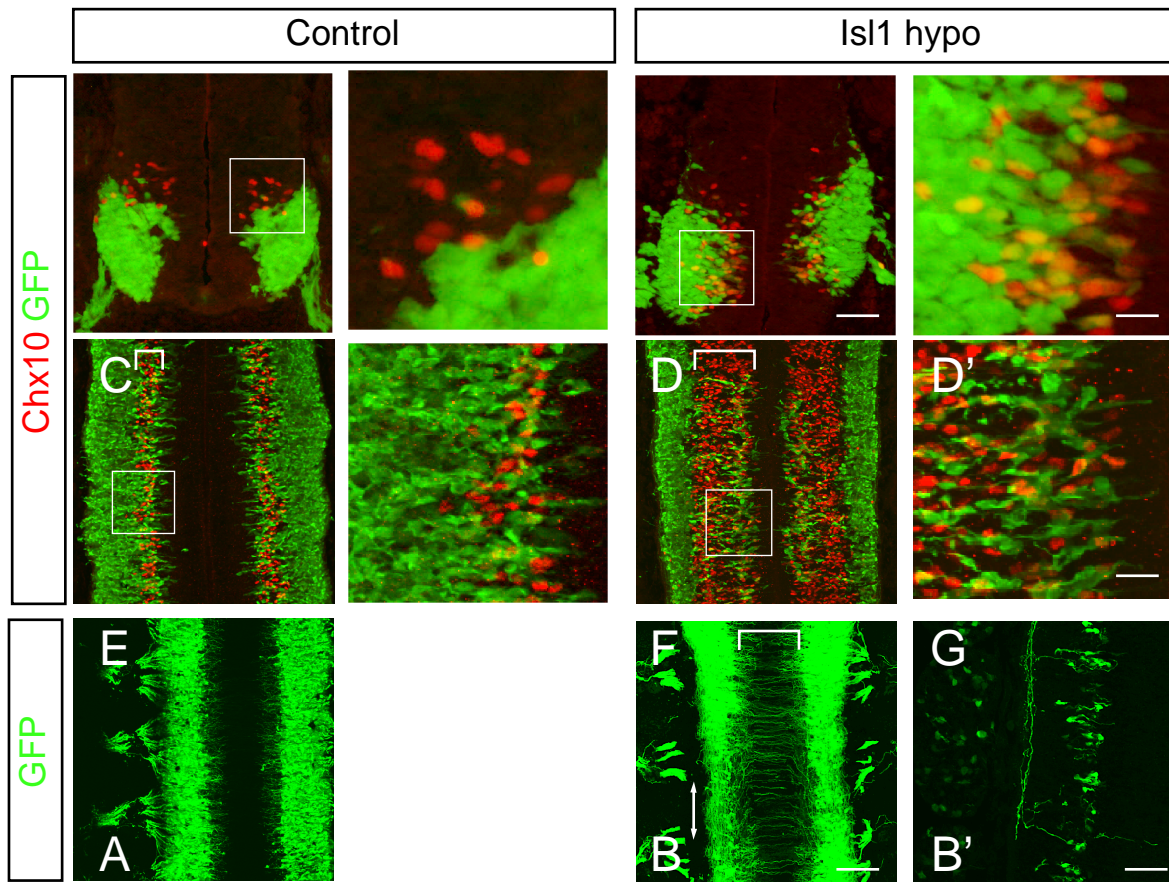

Supplement: supp_136_17_2923__2.pdf [file supp_136_17_2923__2.pdf]
